# Supplementary material for: Effectiveness of Multicomponent Home-Based Rehabilitation in Elderly Patients after Hip Fracture Surgery: A Randomized Controlled Trial
Source: MDPI journal article supplement (doi:10.3390/jpm12040649), 2022-04-18
Supplement: s1 [file s1]

**Supplementary Table S1.** Outcomes for adjusted and unadjusted analyses between-group differences (per protocol)

|                       | Mean ± SD   |             | Change from baseline,<br>Mean (95% CI) |                         | Time × group<br>interaction |
|-----------------------|-------------|-------------|----------------------------------------|-------------------------|-----------------------------|
|                       | Week 4      | Week 8      | Week 4                                 | Week 8                  |                             |
| FRT, cm               |             |             |                                        |                         |                             |
| MHR group             | 21.6 ± 8.0  | 27.1 ± 9.6  | -3.6 (-5.4 to -1.8)                    | -9.5 (-11.2 to -4.1)    | 0.044                       |
| Home exercise group   | 19.5 ± 7.1  | 23.1 ± 8.2  | -0.7 (-1.8 to 0.4)                     | -3.9 (-6.4 to -1.3)     |                             |
| MHR vs. home exercise |             |             | 2.9 (1.0 to 4.9)                       | 5.8 (1.4 to 9.6)        |                             |
| TUG, sec              |             |             |                                        |                         |                             |
| MHR group             | 28.4 ± 11.4 | 25.9 ± 11.1 | 8.2 (5.3 to 11.1)                      | 12.9 (8.3 to 18.8)      | 0.050                       |
| Home exercise group   | 28.5 ± 8.2  | 26.3 ± 6.4  | 5.3 (2.7 to 7.9)                       | 7.9 (5.1 to 11.1)       |                             |
| MHR vs. home exercise |             |             | -2.9 (-6.6 to 0.8)                     | -4.7 (-10.6 to -1.9)    |                             |
| Pain NRS (0-10)       |             |             |                                        |                         |                             |
| MHR group             | 3.4 ± 1.4   | 2.2 ± 1.4   | 1.3 (0.6 to 2.0)                       | 2.4 (1.6 to 3.2)        | 0.150                       |
| Home exercise group   | 3.6 ± 1.2   | 3.3 ± 1.4   | 1.4 (0.6 to 2.1)                       | 1.6 (0.9 to 2.4)        |                             |
| MHR vs. home exercise |             |             | 0.2 (-0.8 to 1.2)                      | -0.6 (-1.6 to 0.3)      |                             |
| K-MBI (0-100)         |             |             |                                        |                         |                             |
| MHR group             | 76.5 ± 20.7 | 82.2 ± 17.4 | -6.1 (-10.5 to -1.6)                   | -11.8 (-18.4 to -5.2)   | 0.560                       |
| Home exercise group   | 80.6 ± 15.1 | 88.5 ± 8.8  | -3.5 (-10.4 to 3.4)                    | -10.2 (-18.6 to -2.8)   |                             |
| MHR vs. home exercise |             |             | 2.6 (-5.2 to 10.4)                     | 1.4 (-6.3 to 10.5)      |                             |
| K-FES (0-100)         |             |             |                                        |                         |                             |
| MHR group             | 40.9 ± 27.0 | 33.3 ± 26.9 | 10.1 (3.2 to 16.4)                     | 17.7 (11.1 to 24.3)     | 0.879                       |
| Home exercise group   | 37.1 ± 17.6 | 30.3 ± 15.0 | 9.0 (4.5 to 13.5)                      | 15.8 (11.0 to 20.7)     |                             |
| MHR vs. home exercise |             |             | -1.1 (-8.8 to 6.7)                     | -1.9 (-10.1 to 6.3)     |                             |
| K-SF-36 (PCS) (0-100) |             |             |                                        |                         |                             |
| MHR group             | 40.4 ± 13.8 | 46.3 ± 18.7 | -6.9 (-11.9 to -1.8)                   | -12.8 (-20.2 to -5.4)   | 0.072                       |
| Home exercise group   | 39.3 ± 15.4 | 42.2 ± 15.0 | -1.9 (-5.5 to 1.7)                     | -4.8 (-8.9 to -0.7)     |                             |
| MHR vs. home exercise |             |             | 5.0 (-0.9 to 10.9)                     | 8.0 (0.1 to 16.1)       |                             |
| K-SF-36 (MCS) (0-100) |             |             |                                        |                         |                             |
| MHR group             | 50.2 ± 10.4 | 53.6 ± 11.1 | -8.9 (-14.5 to -3.2)                   | -12.2 (-17.9 to -6.5)   | 0.237                       |
| Home exercise group   | 53.0 ± 13.9 | 54.6 ± 12.2 | -5.2 (-9.1 to -1.4)                    | -6.8 (-11.9 to -1.8)    |                             |
| MHR vs. home exercise |             |             | 3.6 (-2.9 to 10.1)                     | 5.4 (-1.9 to 12.6)      |                             |
| K-CES-D (0-60)        |             |             |                                        |                         |                             |
| MHR group             | 15.9 ± 10.6 | 11.2 ± 8.5  | 12.3 (4.7 to 19.9)                     | 17.0 (10.2 to 23.8)     | 0.009 / 0.953 <sup>†</sup>  |
| Home exercise group   | 11.4 ± 8.3  | 7.4 ± 5.0   | 1.8 (-4.2 to 7.7)                      | 5.8 (-0.7 to 12.3)      |                             |
| MHR vs. home exercise |             |             | -10.5 (-19.7 to -1.3)                  | -11.2 (-20.2 to -2.3)   |                             |
| Muscle strength       |             |             |                                        |                         |                             |
| Hip flexor, kg        |             |             |                                        |                         |                             |
| MHR group             | 64.8 ± 23.8 | 80.3 ± 24.3 | -13.7 (-22.8 to -4.)                   | -29.1 (-40.3 to -17.9 ) | 0.096                       |
| Home exercise group   | 59.2 ± 21.7 | 66.8 ± 20.8 | -8.9 (-16.9 to -0.9)                   | -16.4 (-25.2 to -7.7)   |                             |
| MHR vs. home exercise |             |             | 4.7 (-6.8 to 16.3)                     | 12.7 (-0.9 to 26.2)     |                             |
| Hip abductor, kg      |             |             |                                        |                         |                             |
| MHR group             | 69.4 ± 19.4 | 80.8 ± 22.6 | -8.9 (-13.8 to -4.0)                   | -21.3 (-30.2 to -12.5)  | 0.340                       |
| Home exercise group   | 65.7 ± 19.1 | 72.5 ± 16.6 | -8.3 (-16.8 to 0.2)                    | -15.2 (-22.0 to -8.3)   |                             |
| MHR vs. home exercise |             |             | 0.6 (-8.6 to 9.7)                      | 6.1 (-4.7 to 16.9)      |                             |
| Knee flexor, kg       |             |             |                                        |                         |                             |
| MHR group             | 71.5 ± 23.5 | 83.2 ± 30.2 | -14.5 (-23.8 to -5.1)                  | -26.1 (-37.2 to -14.9)  | 0.428                       |
| Home exercise group   | 68.8 ± 23.6 | 77.5 ± 16.6 | -9.5 (-18.6 to -0.3)                   | -18.1 (-25.3 to -10.8)  |                             |
| MHR vs. home exercise |             |             | 5.0 (-7.5 to 17.5)                     | 8.0 (-4.9 to 20.9)      |                             |
| Knee extensor, kg     |             |             |                                        |                         |                             |
| MHR group             | 74.1 ± 24.5 | 95.8 ± 32.0 | -10.8 (-17.9 to -3.6)                  | -32.4 (-42.0 to -22.8)  | 0.021                       |
| Home exercise group   | 78.2 ± 14.9 | 88.5 ± 13.5 | -8.6 (-13.9 to -3.3)                   | -18.9 (-26.7 to -11.1)  |                             |
| MHR vs. home exercise |             |             | 2.2 (-6.4 to 10.8)                     | 13.5 (1.5 to 25.4)      |                             |
| Grip strength, kg     |             |             |                                        |                         |                             |
| MHR group             | 17.5 ± 6.1  | 19.9 ± 4.8  | -0.2 (-2.7 to 2.3)                     | -2.5 (-4.8 to -0.2)     | 0.471                       |
| Home exercise group   | 16.7 ± 5.4  | 17.21 ± 6.3 | -0.2 (-2.5 to 2.1)                     | -0.8 (-4.2 to 2.5 )     |                             |
| MHR vs. home exercise |             |             | 0.0 (-3.2 to 3.2)                      | 1.7 (-2.1 to 5.5)       |                             |

<sup>†</sup> Adjusted for baseline. Abbreviations: NRS, numeric rating scale; FRT, functional reach test; TUG, Timed Up and Go Test; K-MBI, Korean version of the Modified Barthel Index; K-FES, Korean version of the Fall Efficacy Scale; K-SF-36, Korean version of the 36-item Short Form Survey; PCS, physical component score; MCS, mental component score; K-CES-D, Korean version of the Center for Epidemiological Studies Depression Scale.
